# Supplementary material for: Exosomes mediated fibrogenesis in dilated cardiomyopathy through a MicroRNA pathway
Source: PubMed Central journal article supplement — iScience. 2023 Jan 13;26(2):105963. doi: 10.1016/j.isci.2023.105963 (PMC9932122; doi:10.1016/j.isci.2023.105963), 2023-01-13
Supplement: mmc1.pdf [file mmc1.pdf]

**Supplemental information**

**Exosomes mediated fibrogenesis in dilated  
cardiomyopathy through a MicroRNA pathway**

**Xuebin Fu, Rachana Mishra, Ling Chen, Mir Yasir Arfat, Sudhish Sharma, Tami Kingsbury, Muthukumar Gunasekaran, Progyaparamita Saha, Charles Hong, Peixin Yang, Deqiang Li, and Sunjay Kaushal**

1  
2  
3  
4  
5  
6  
7  
8  
9  
10  
11  
12  
13  
14  
15  
16  
17  
18

**Supplemental Information**

Exosomes Mediated Fibrogenesis in Dilated Cardiomyopathy Through a MicroRNA Pathway

Xuebin Fu, Rachana Mishra, Ling Chen, Mir Yasir Arfat, Sudhish Sharma, Tami Kingsbury,  
Charles Hong, Peixin Yang, Deqiang Li, Sunjay Kaushal

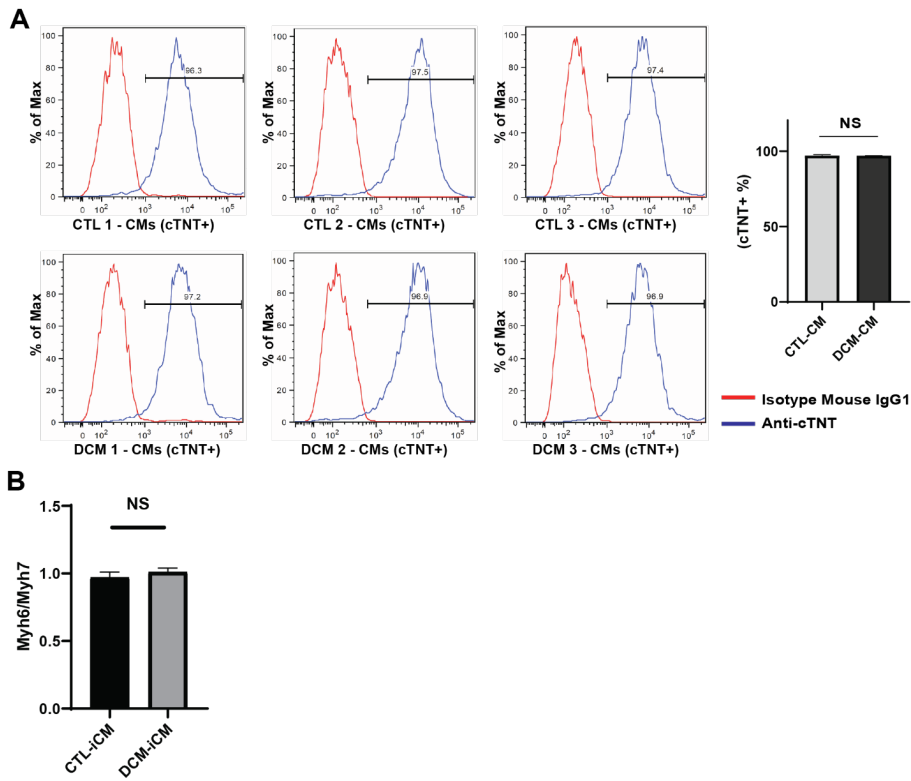

20

21 **Figure S1.** The purity and maturation of CTL- and DCM-iPSC differentiated cardiomyocytes were  
22 determined by flow cytometry and RT-PCR. (A) Histograms for flow cytometric analysis of  
23 cTNT<sup>+</sup> in CTL-iCMs and DCM-iCMs. (B) Quantification of myh6 to myh7 ratio in CTL- and  
24 DCM-iCMs. Three CTL lines and 3 DCM lines were used in the experiments. Related to Figure  
25 1.

26

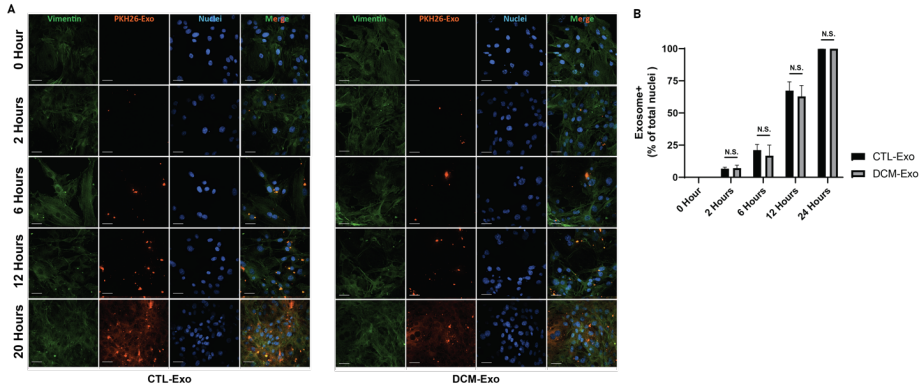

27

28 **Figure S2.** Time course assay of PKH26-labeled Exos treatment in vitro. The pictures were taken  
 29 from different time-points after Exos treatment (A). Bar = 50um. The Exos uptake at different time  
 30 points was analyzed (B). Related to Figure 2.

31

32

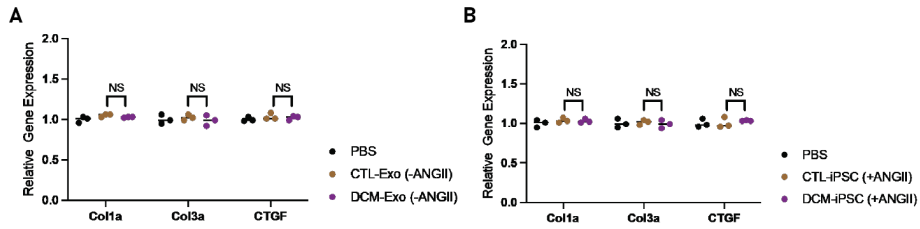

33

34 **Figure S3.** Neither Exos derived from basal media nor the Exos derived from iPSCs promoted  
 35 fibrogenesis. The expression of fibrotic markers was determined by qRT-PCR. (A), CFs were  
 36 treated with vehicle (PBS), CTL-Exo, or DCM-Exo derived from cardiomyocytes cultured in basal  
 37 media. N= 3; One-way ANOVA. (B), CFs were treated with vehicle (PBS) or Exos derived from  
 38 ANG II stimulated CTL-iPSC or DCM-iPSC. N= 3; One-way ANOVA; NS = no significance.  
 39 Related to Figure 2.  
 40

Deleted: baseline

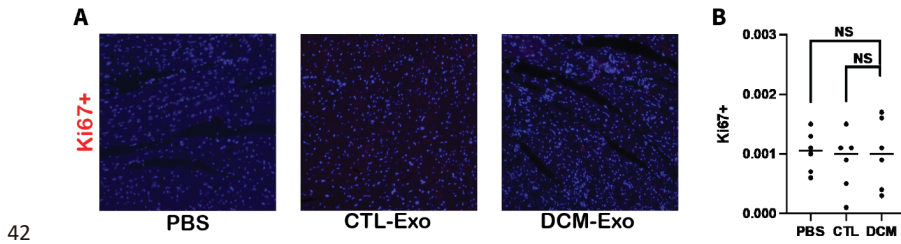

**Figure S4.** The injection of Exos did not induce proliferation in the hearts. (A) Immunofluorescent staining of detecting Ki67 (Red) in the vehicle, CTL-Exo, or DCM-Exo injection heart sections. The positive Ki67 indicated the proliferative cells in the hearts. (B) Statistical analysis showed positive Ki67 showed no significant differences. N= 6; One-way ANOVA; NS = nonsignificant. Related to Figure 3.

**A**

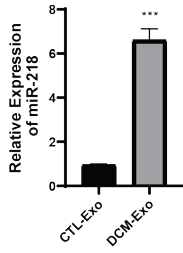

49

50 **Figure S5.** RT-PCR determined the expression of miR-218 in Exos. (A) Compared with CTL-  
51 Exos, miR-218-5p expression in DCM-Exos was significantly increased. N=3; [Student's \*t\*-test](#);  
52 \*\*\*=P < 0.005. Related to Figure 4.

53  
54

Formatted: Font: Italic

Deleted: 6.421 ±

56 **Table S1.** iPSCs used in this study. Related to Figure 1.

| Patient No. | Cell Type                       | Disease                        | Age | Gender | Race             | Passage |
|-------------|---------------------------------|--------------------------------|-----|--------|------------------|---------|
| SCVI479     | Sendai virus reprogrammed hiPSC | Healthy Donor                  | 24  | Male   | African American | 10      |
| SCVI480     | Sendai virus reprogrammed hiPSC | Healthy Donor                  | 18  | Female | African American | 8       |
| SCVII15     | Sendai virus reprogrammed hiPSC | Healthy Donor                  | 16  | Male   | Caucasian        | 8       |
| SCVII17     | Sendai virus reprogrammed hiPSC | DCM,TN<br>NT2 <sup>R173W</sup> | 75  | Female | Caucasian        | 8       |
| SCVII18     | Sendai virus reprogrammed hiPSC | DCM,TN<br>NT2 <sup>R173W</sup> | 39  | Male   | Caucasian        | 11      |
| SCVII19     | Sendai virus reprogrammed hiPSC | DCM,TN<br>NT2 <sup>R173W</sup> | 46  | Male   | Asian            | 9       |

57  
58



59 **Table S2.** Sequence of wild-type 5'UTR and mutated 5'UTR. Related to Figure 7.

| Name      | Sequence                                                                                                                                                                                                                                                                                                                                        |
|-----------|-------------------------------------------------------------------------------------------------------------------------------------------------------------------------------------------------------------------------------------------------------------------------------------------------------------------------------------------------|
| Wild-type | gcagtctgca gtcttcgtgg cgggccaagc gagcttggag ccgcgggggg cggagcggtg<br>agagcggccg ccaagagaga tcacacccc agccgaccct gccagcgagc gagcccgacc<br>ccaggcgctc atggagcgtc gcctccgcc ggtccctgcc ccgacccccg cctgcggcgc<br>gctctgcct tgaccaggac ttgggacttt gcgaaaggat cgcggggccc ggagaggtaa<br>ccgccgcgc tccgggagag gtgttggaga gcacaatggc tgaacaagtc ctctcagg |
| Mutation  | gcagtctgca gtcttcgtgg cgggccaagc gagcttggag ccgcgggggg cggagcggtg<br>agagcggccg ccaagagaga tcacacccc agccgaccct gccagcgagc gagcccgacc<br>ccaggcgctc atggagcgtc gcctccgcc ggtccctgcc ccgacccccg cctgcggcgc<br>gctctgcct tgaccaggac ttgggacttt gcgaaaggat cgcggggccc ggagaggtaa<br>ccgccgcgc tccgggagag ctataccgc tcttggc tgaacaagtc ctctcagg     |

60
